# Supplementary material for: Mapping the Evolution of Hypervirulent Klebsiella pneumoniae
Source: PubMed Central journal article supplement — mBio. 2015 Jul 21;6(4):e00630-15. doi: 10.1128/mBio.00630-15 (PMC4513082; doi:10.1128/mbio.00630-15), 2015-07-21
Supplement: mbo004152403sf1.pdf [file mbo004152403sf1.pdf]

Fig S1

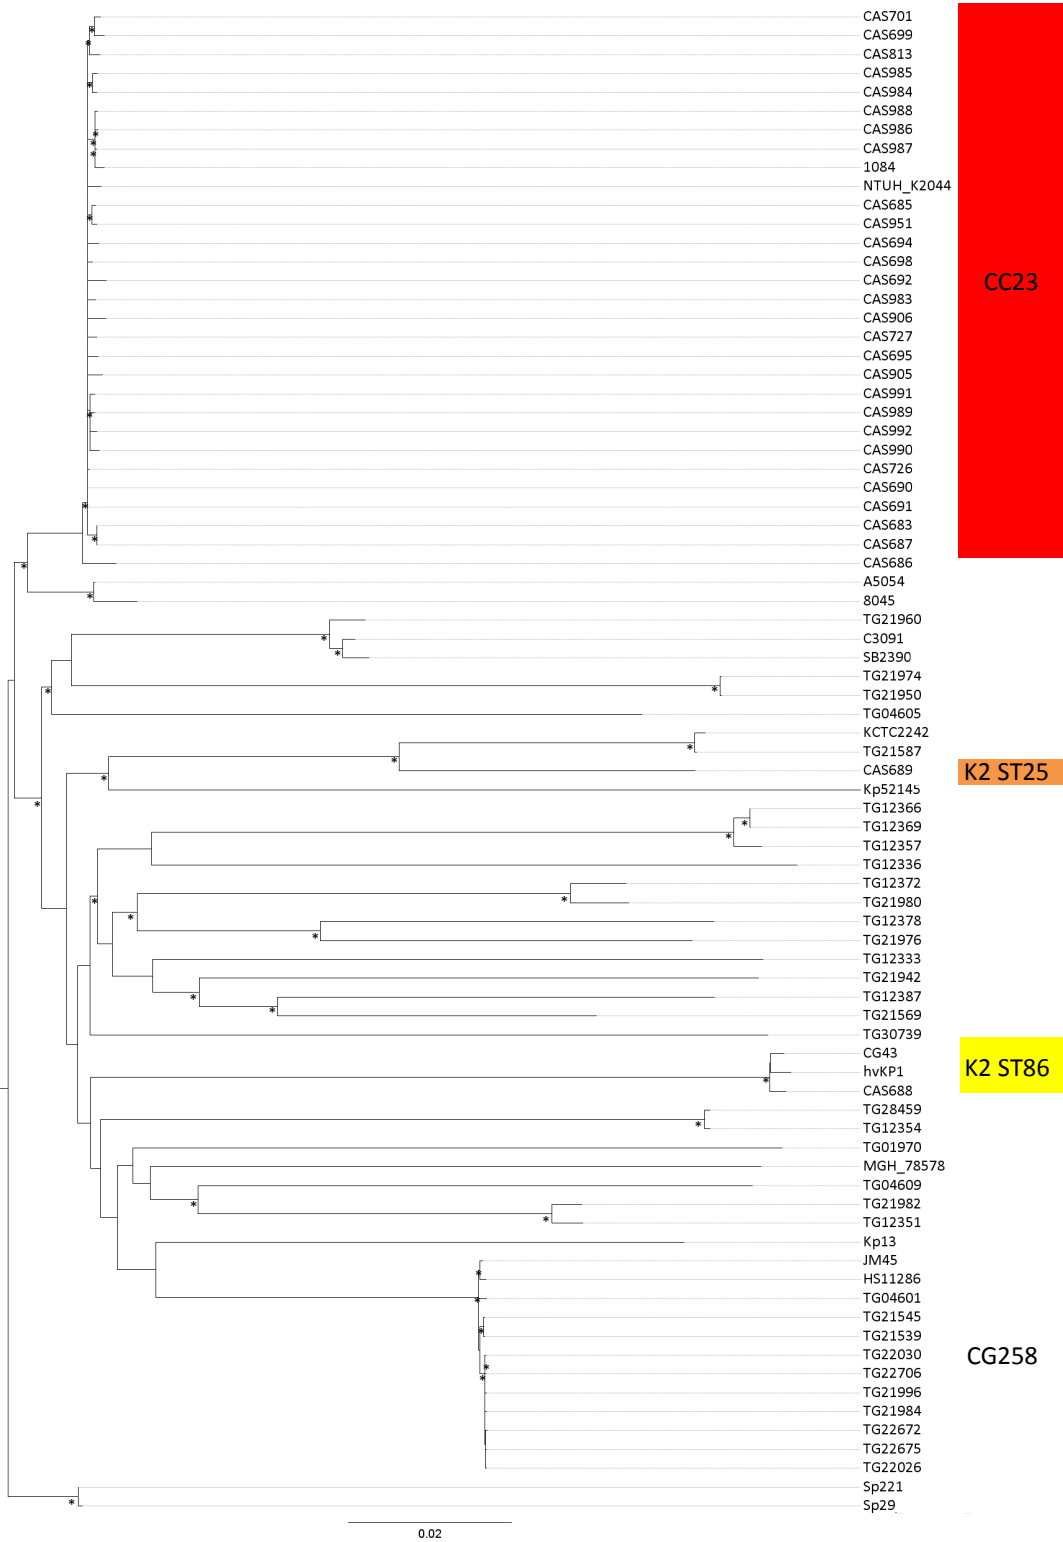

FIG S1 Rooted maximum-likelihood phylogeny of 80 *K. pneumoniae* isolates after recombination filtering by Gubbins (34). Hypervirulent clonal lineages (ST14, CC23, and ST86) are marked with shadings.
