# Supplementary material for: Mapping the Evolution of Hypervirulent Klebsiella pneumoniae
Source: PubMed Central journal article supplement — mBio. 2015 Jul 21;6(4):e00630-15. doi: 10.1128/mBio.00630-15 (PMC4513082; doi:10.1128/mbio.00630-15), 2015-07-21
Supplement: mbo004152403sf2.pdf [file mbo004152403sf2.pdf]

Fig S2

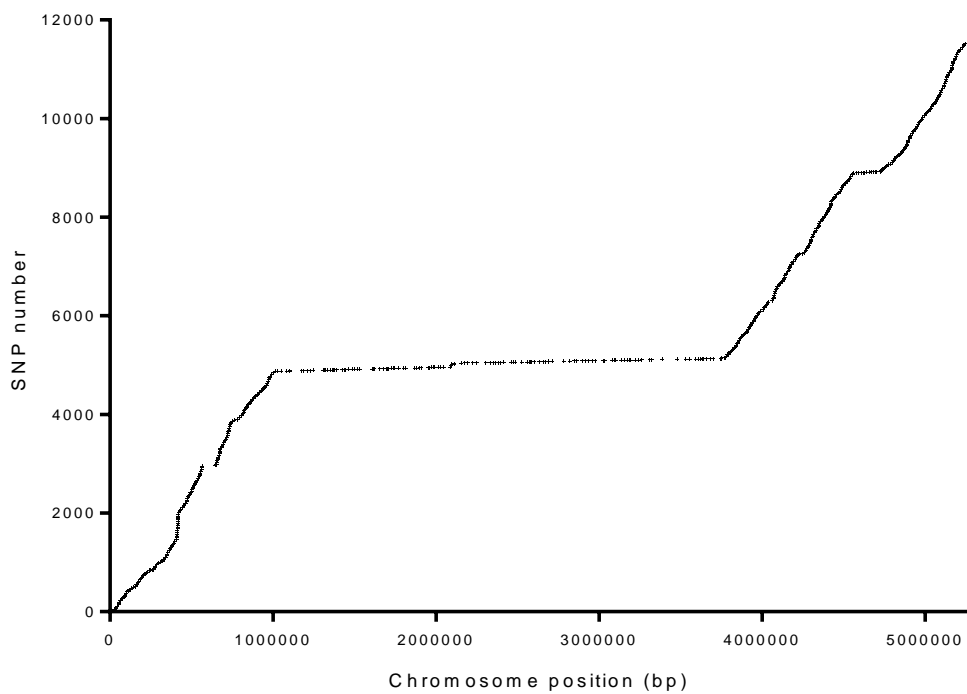

FIG S2 Scatterplot of SNP number in CAS686 related to position in the NTUH-K2044 chromosome. Of 11,519 SNPs identified, only 254 SNPs were located in the region corresponding to position 1.0 to 3.7 Mbp in the NTUH-K2044 chromosome revealing a chimeric composition of CAS686 between a CC23 strain and a strain of unknown clonal origin.
