# Supplementary material for: Mapping the Evolution of Hypervirulent Klebsiella pneumoniae
Source: PubMed Central journal article supplement — mBio. 2015 Jul 21;6(4):e00630-15. doi: 10.1128/mBio.00630-15 (PMC4513082; doi:10.1128/mbio.00630-15), 2015-07-21
Supplement: mbo004152403sf4.pdf [file mbo004152403sf4.pdf]

Fig. S4

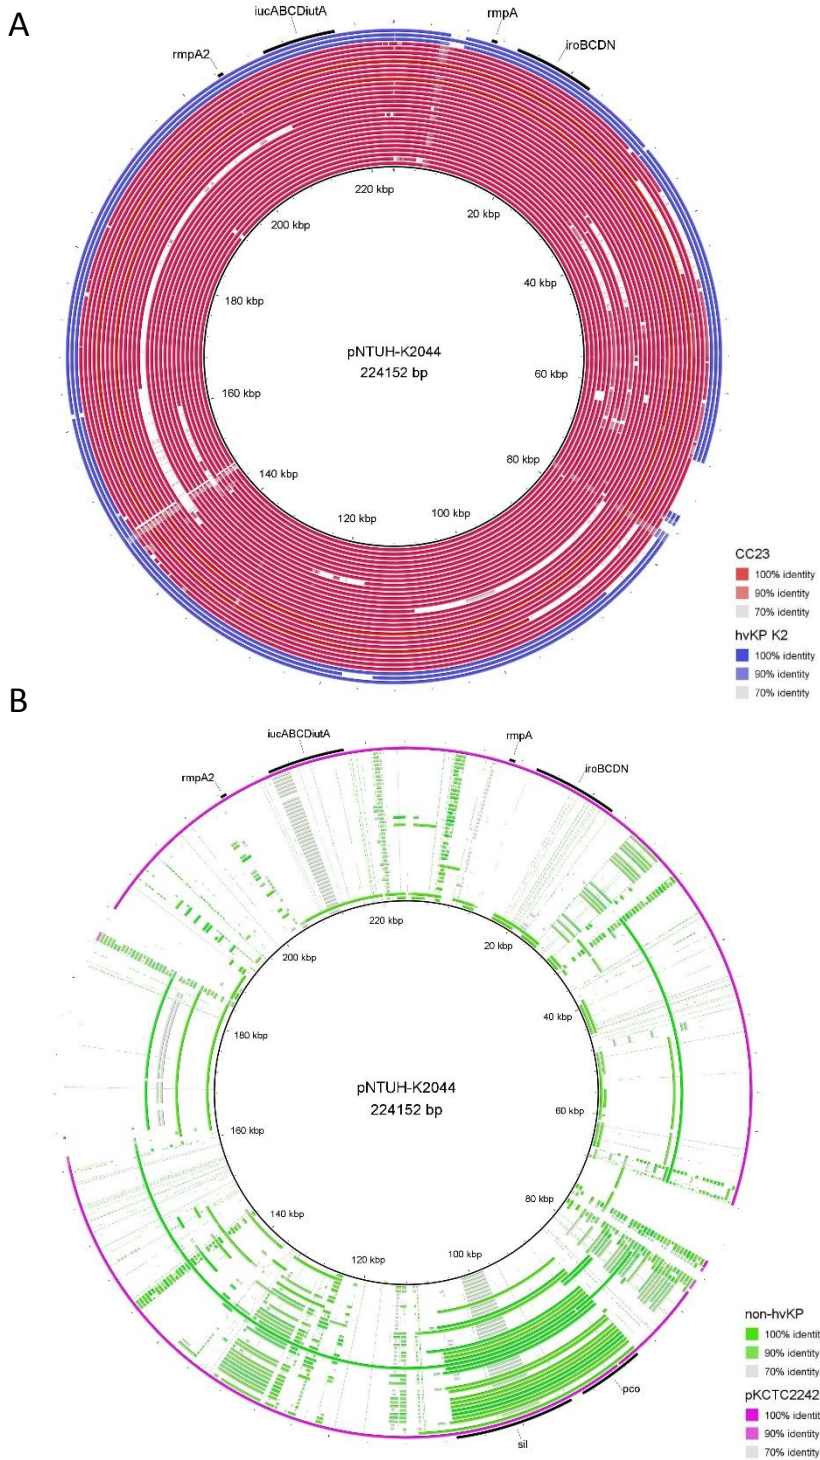

FIG S4 BLASTN atlas illustrating the presence of the pNTUH-K2044 virulence plasmid in hypervirulent (A) and non-hypervirulent (B) *K. pneumoniae* isolates. Annotated regions indicate genes encoding the virulence factors RmpA, RmpA2, aerobactin (*iucABCDiutA*), and salmochelin (*iroBCDN*) and gene clusters encoding silver (*sil*) and copper resistance (*pco*). Red rings in FIG S4A are the 28 CC23 related isolates in the same order from in to out as outlined in Table S1 (CAS683 to CAS686). Blue rings in FIG S4A are from in to out the hypervirulent K2 isolates CAS688, CAS689, and the virulence plasmid pLVPK from the K2 strain CG43. Green rings in FIG S4B are the 39 non-hypervirulent isolates in the same order from in to out as outlined in Table S1 (A5054 to 3091). The purple ring is pKCTC2242 from strain KCTC 2242 of unknown virulence potential.
