# Supplementary material for: Mapping the Evolution of Hypervirulent Klebsiella pneumoniae
Source: PubMed Central journal article supplement — mBio. 2015 Jul 21;6(4):e00630-15. doi: 10.1128/mBio.00630-15 (PMC4513082; doi:10.1128/mbio.00630-15), 2015-07-21
Supplement: mbo004152403st1.pdf [file mbo004152403st1.pdf]

|         |            |    |      |                   |     |     |   |   |   |   |   |   |   |   |
|---------|------------|----|------|-------------------|-----|-----|---|---|---|---|---|---|---|---|
| TG21950 | This study | US | 2010 | Urinary tract     | K2  | 461 | 0 | 0 | 0 | 0 | 0 | 0 | 1 | 0 |
| TG21960 | This study | US | 2011 | Respiratory tract |     | 15  | 0 | 0 | 0 | 0 | 0 | 0 | 1 | 0 |
| TG21974 | This study | US | 2011 | Bacteremia        | K2  | 461 | 0 | 0 | 0 | 0 | 0 | 0 | 1 | 0 |
| TG21976 | This study | US | 2011 | Bacteremia        |     | 192 | 0 | 0 | 0 | 0 | 0 | 0 | 0 | 0 |
| TG21980 | This study | US | 2010 | Bacteremia        |     | 34  | 0 | 0 | 0 | 0 | 0 | 0 | 0 | 0 |
| TG21982 | This study | US | 2010 | Bacteremia        |     | 37  | 0 | 1 | 0 | 0 | 0 | 0 | 0 | 0 |
| TG21984 | This study | US | 2010 | Urinary tract     |     | 258 | 0 | 0 | 0 | 0 | 0 | 0 | 0 | 0 |
| TG21996 | This study | US | 2011 | Urinary tract     |     | 258 | 0 | 0 | 0 | 0 | 0 | 0 | 0 | 0 |
| TG22026 | This study | US | 2011 | Urinary tract     |     | 258 | 0 | 0 | 0 | 0 | 0 | 0 | 0 | 0 |
| TG22030 | This study | US | 2011 | Urinary tract     |     | 258 | 0 | 0 | 0 | 0 | 0 | 0 | 0 | 0 |
| TG22672 | This study | US | 2010 | Urinary tract     |     | 258 | 0 | 0 | 0 | 0 | 0 | 0 | 0 | 0 |
| TG22675 | This study | US | 2010 | Urinary tract     |     | 258 | 0 | 0 | 0 | 0 | 0 | 0 | 0 | 0 |
| TG22706 | This study | US | 2010 | Urinary tract     |     | 258 | 0 | 0 | 0 | 0 | 0 | 0 | 0 | 0 |
| TG28459 | This study | US | 2011 | Urinary tract     |     | 36  | 0 | 1 | 0 | 0 | 0 | 0 | 0 | 0 |
| TG30739 | This study | US | 2011 | Urinary tract     |     | 774 | 0 | 0 | 0 | 0 | 0 | 0 | 0 | 0 |
| C3091   | 8          | US |      | Urinary tract     | K16 | 14  | 0 | 0 | 0 | 0 | 0 | 0 | 1 | 0 |

<sup>a</sup>Single locus variant of ST23

References:

1. Stahlhut SG, Chattopadhyay S, Struve C, Weissman SJ, Aprikian P, Libby SJ, Fang FC, Krogfelt KA, Sokurenko E V. 2009. Population variability of the FimH type 1 fimbrial adhesin in *Klebsiella pneumoniae*. J. Bacteriol. **191**:1941–50.
2. Sobirk SK, Struve C, Jacobsson SG. 2010. Primary *Klebsiella pneumoniae* Liver Abscess with Metastatic Spread to Lung and Eye, a North-European Case Report of an Emerging Syndrome. Open Microbiol. J. **4**:5–7.
3. Holmås K, Fostervold A, Stahlhut SG, Struve C, Holter JC. 2014. Emerging K1 serotype *Klebsiella pneumoniae* primary liver abscess: three cases presenting to a single university hospital in Norway. Clin. Case Reports **2**:122–7.
4. Gundestrup S, Struve C, Stahlhut SG, Hansen DS. 2014. First Case of Liver Abscess in Scandinavia Due to the International Hypervirulent *Klebsiella Pneumoniae* Clone ST23. Open Microbiol. J. **8**:22–4.
5. Yu VL, Hansen DS, Ko WC, Sagnimeni A, Klugman KP, von Gottberg A, Goossens H, Wagener MM, Benedi VJ. 2007. Virulence characteristics of *Klebsiella* and clinical manifestations of *K. pneumoniae* bloodstream infections. Emerg. Infect. Dis. **13**:986–93.
6. Ørskov I, Ørskov F. 1984. Serotyping of *Klebsiella*. Methods Microbiol **14**:143–164.
7. Hansen DS, Gottschau A, Kolmos HJ. 1998. Epidemiology of *Klebsiella* bacteraemia: a case control study using *Escherichia coli* bacteraemia as control. J. Hosp. Infect. **38**:119–32.
8. Struve C, Forestier C, Krogfelt KA. 2003. Application of a novel multi-screening signature-tagged mutagenesis assay for identification of *Klebsiella pneumoniae* genes essential in colonization and infection. Microbiology **149**:167–176.
